# Supplementary material
Source: ML conference proceedings conference paper supplement (https://proceedings.mlr.press/v189/li23c.html)
Supplement: Supplementary file 1 [file li23c-supp.pdf]

# Robust Direct Learning for Causal Data Fusion (Supplementary Material)

**Xinyu Li**<sup>1,2</sup>

**Yilin Li**<sup>1</sup>

**Qing Cui**<sup>2</sup>

**Longfei Li**<sup>2</sup>

**Jun Zhou**<sup>2</sup>

XINYU.LI@PKU.EDU.CN

YILINLI@PKU.EDU.CN

CUIQING.CQ@ANTGROUP.COM

LONGYAO.LLF@ANTGROUP.COM

JUN.ZHOIJUN@ANTFIN.COM

<sup>1</sup>*School of Mathematical Sciences, Peking University, Beijing, China*

<sup>2</sup>*Ant Group, Hangzhou, China*

**Editors:** Emtiyaz Khan and Mehmet Gönen

In this Supplementary Material, we present technical proofs of Theorem 4 in Section S.1, and further details of simulation studies in Section S.2.

## S.1. Proof of Theorem 4

**Proof** Under Assumptions 1, 2 and 3, we have

$$\begin{aligned}
 & E \left[ \frac{w_S(X)}{\tilde{p}_{A|S}(X, Z_S)} \left\{ \frac{Y - \tilde{m}_S(X, Z_S)}{A} - l(X) \right\}^2 \right] \\
 = & E \left[ \frac{w_S(X)}{\tilde{p}_{A|S}(X, Z_S)} \{Y - \tilde{m}_S(X, Z_S) - Al(X)\}^2 \right] \\
 = & \sum_{s \in \mathcal{S}} E \left[ \frac{w_s(X)}{\tilde{p}_{A|s}(X, Z_s)} \{Y - \tilde{m}_s(X, Z_s) - Al(X)\}^2 \mid S = s \right] P(S = s) \\
 = & \sum_{s \in \mathcal{S}} E \left[ w_s(X) \sum_{a \in \{-1, 1\}} \frac{\mathbb{1}(A = a)}{\tilde{p}_{a|s}(X, Z_s)} \{Y(a) - \tilde{m}_s(X, Z_s) - al(X)\}^2 \mid S = s \right] P(S = s) \\
 = & \sum_{s \in \mathcal{S}} E \left[ w_s(X) \sum_{a \in \{-1, 1\}} \frac{p_{a|s}(X, Z_s)}{\tilde{p}_{a|s}(X, Z_s)} \{m_s + a\delta(X, Z_s) + \varepsilon_s - \tilde{m}_s - al(X)\}^2 \mid S = s \right] P(S = s),
 \end{aligned}$$

where the first equality follows from  $A \in \{-1, 1\}$ , the second from the law of total probability, the third from  $Y = \sum_a \mathbb{1}(A = a)Y(a)$  and the fourth from  $Y = m_S(X, Z_S) + A\delta_S(X, Z_S) + \varepsilon_S$ .

Thus it suffices to show that for each data source  $S = s$ , if either of the two conditions in Theorem 4 holds, then

$$\delta(X) \in \arg \min_l E \left[ w_s(X) \sum_{a \in \{-1,1\}} \frac{p_{a|s}(X, Z_s)}{\tilde{p}_{a|s}(X, Z_s)} \{m_s + a\delta(X, Z_s) + \varepsilon_s - \tilde{m}_s - al(X)\}^2 \mid S = s \right].$$

In the following, we consider the cases in which each of the two conditions holds.

(i) If  $\tilde{p}_{a|s}(X, Z_s) = p_{a|s}(X, Z_s)$ , we have

$$\begin{aligned} & \arg \min_l E \left[ w_s(X) \sum_{a \in \{-1,1\}} \frac{p_{a|s}(X, Z_s)}{\tilde{p}_{a|s}(X, Z_s)} \{m_s + a\delta(X, Z_s) + \varepsilon_s - \tilde{m}_s - al(X)\}^2 \mid S = s \right] \\ &= \arg \min_l E \left[ w_s(X) \sum_{a \in \{-1,1\}} \{m_s - \tilde{m}_s + \varepsilon_s + a\delta(X, Z_s) - al(X)\}^2 \mid S = s \right] \\ &= \arg \min_l E \left[ w_s(X) \{2l^2(X) - 4l(X)\delta(X, Z_s)\} \mid S = s \right]. \end{aligned}$$

Then Equation (3) in Theorem 4 follows because

$$\delta(X) = E\{\delta(X, Z_s) \mid X, S = s\} \in \arg \min_l E \left[ l^2(X) - 2l(X)\delta(X, Z_s) \mid X, S = s \right].$$

(ii) If  $\tilde{m}_s(X, Z_s) = m_s(X, Z_s)$ , we have

$$\begin{aligned} & \arg \min_l E \left[ w_s(X) \sum_{a \in \{-1,1\}} \frac{p_{a|s}(X, Z_s)}{\tilde{p}_{a|s}(X, Z_s)} \{m_s + a\delta(X, Z_s) + \varepsilon_s - \tilde{m}_s - al(X)\}^2 \mid S = s \right] \\ &= \arg \min_l E \left[ w_s(X) \sum_{a \in \{-1,1\}} \frac{p_{a|s}(X, Z_s)}{\tilde{p}_{a|s}(X, Z_s)} \{a\delta(X, Z_s) + \varepsilon_s - al(X)\}^2 \mid S = s \right], \\ &= \arg \min_l E \left[ w_s(X) \left\{ 2 \left( \frac{p_{1|s}}{\tilde{p}_{1|s}} + \frac{p_{-1|s}}{\tilde{p}_{-1|s}} \right) l^2(X) - 4 \left( \frac{p_{1|s}}{\tilde{p}_{1|s}} + \frac{p_{-1|s}}{\tilde{p}_{-1|s}} \right) l(X)\delta(X, Z_s) \right\} \mid S = s \right]. \end{aligned}$$

Since

$$h(X) \in \arg \min_l E \left[ \left\{ \left( \frac{p_{1|s}}{\tilde{p}_{1|s}} + \frac{p_{-1|s}}{\tilde{p}_{-1|s}} \right) l^2(X) - 2 \left( \frac{p_{1|s}}{\tilde{p}_{1|s}} + \frac{p_{-1|s}}{\tilde{p}_{-1|s}} \right) l(X)\delta(X, Z_s) \right\} \mid X, S = s \right],$$

where

$$\begin{aligned} h(X) &= E \left\{ \left( \frac{p_{1|s}}{\tilde{p}_{1|s}} + \frac{p_{-1|s}}{\tilde{p}_{-1|s}} \right) \delta(X, Z_s) \mid X, S = s \right\} / E \left\{ \left( \frac{p_{1|s}}{\tilde{p}_{1|s}} + \frac{p_{-1|s}}{\tilde{p}_{-1|s}} \right) \mid X, S = s \right\} \\ &= E\{e_A(X, Z_s)\delta(X, Z_s) \mid X, S = s\}, \end{aligned}$$

and the fact that  $\tilde{p}_{a|s}(X, Z_s)$  satisfies the partial balance property with respect to  $\delta(X, Z_s)$ , Equation (3) in Theorem 4 follows and we complete the proof. ■

## S.2. Further Details of Experiments

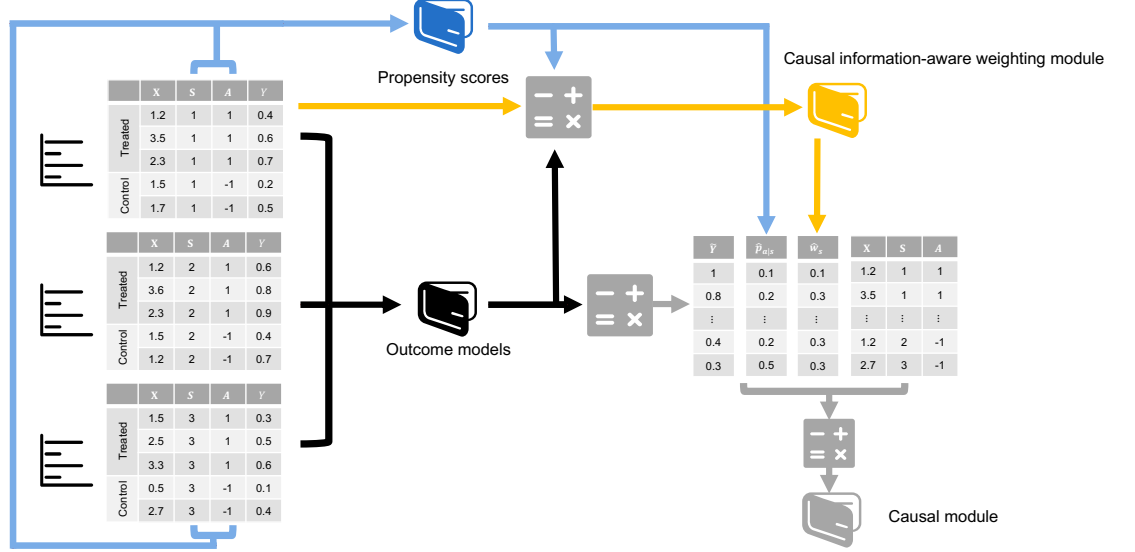

Figure 1: Illustration diagram of our proposed two-step algorithm WMDL, where the nuisance functions include the main effect functions, treatment propensity scores and information-aware weighting functions. The estimate of CATE is obtained by regressing the pseudo-outcomes on the covariates using weighted least squares. See Algorithm 1 in the main text.

The main effect functions  $m_s$  are specified as follows.

- Scenario I:

$$\begin{aligned}
 m_1(X) &= 1 + X_1 \mathbb{1}(X_2 > 0.5) + 5X_3X_4, \\
 m_2(X) &= -X_4 \mathbb{1}(X_4 > 0.5) + 5X_1X_2 - X_3, \\
 m_3(X) &= \mathbb{1}(X_3 > 0.5) \mathbb{1}(X_2 > 0.5) - 2\mathbb{1}(X_1 < 0.5), \\
 m_4(X) &= 2X_1^2 + 2X_2^2 + 2X_3^2 + 2X_4^2, \\
 m_5(X) &= 3X_1X_2 + 3X_3X_4 + 3X_2X_3,
 \end{aligned}$$

and  $m_{j+5}(X) = -m_j(X)$  for  $j = 1, 2, \dots, 5$ .

- Scenario II: For  $s = 1, \dots, K$ ,

$$m_s(X, Z_s) = m_s(X) + 3Z_s \mathbb{1}(\mathcal{S}_1) + 2Z_s \mathbb{1}(s \leq 5) \mathbb{1}(X_4 < 0.5) + Z_s \mathbb{1}(s > 5) \mathbb{1}(X_4 > 0.5).$$

To further support our method, we conduct more simulated experiments and present numerical results online, see the website <https://github.com/xinyuli-stat/CausalDataFusion>.
